# Supplementary material for: GYS1 induces glycogen accumulation and promotes tumor progression via the NF-κB pathway in Clear Cell Renal Carcinoma
Source: PubMed Central journal article supplement (PMC7415807; doi:10.7150/thno.46825), 2020-07-14
Supplement: thnov10p9186s1.pdf [file thnov10p9186s1.pdf]

## Supplementary Tables

**Table S1.** Primers and siRNAs

| <b>Primers</b>         |                         |
|------------------------|-------------------------|
| <b>Identifier Type</b> | <b>Sequence (5'-3')</b> |
| GYS1-F                 | CAGCGCGGACCAACAATTC     |
| GYS1-R                 | TCCTCCCGAACTTTTCCTTCA   |
| RPS27A-F               | CTGGAAGATGGACGTACTTTGTC |
| RPS27A -R              | CGACGAAGGCGACTAATTTTGC  |
| 18S-F                  | TGAGAAACGGCTACCACATCC   |
| 18S-R                  | ACCAGACTTGCCCTCCAATG    |
| FAS-F                  | GAAGAGTCTTCGTCAGCCAGGA  |
| FAS-R                  | TGGCTTCATAGGTGACTTCCA   |
| SREBP1-F               | ACTTCTGGAGGCATCGCAAGCA  |
| SREBP1-R               | AGGTTCCAGAGGAGGCTACAAG  |
| CPT1A-F                | TCCAGTTGGCTTATCGTGGTG   |
| CPT1A-R                | TCCAGAGTCCGATTGATTTTGC  |

| <b>siRNAs</b>          |                         |
|------------------------|-------------------------|
| <b>Identifier Type</b> | <b>Sequence (5'-3')</b> |
| GYS1-1                 | CCAACGACGCUGUCCUCUUTT   |
| GYS1-2                 | CCAUCGAGGCACAGCACUUTT   |
| RPS27A-1               | TTAGTCGCCTTCGTCGAGA     |
| RPS27A-2               | CAGACATTATTGTGGCAA      |
| p65-1                  | GAUGAGAUCUUCUACUGU      |
| p65-2                  | GCCCUAUCCCUUUACGUCA     |

**Table S2.** The characteristics of patients diagnosed with ccRCC in SYSUCC in 2004–2012 (n = 306)

| Characteristic              | Number | Percentage (%) |
|-----------------------------|--------|----------------|
| Age(years)                  |        |                |
| ≤55                         | 174    | 56.9           |
| >55                         | 132    | 43.1           |
| Gender                      |        |                |
| Male                        | 209    | 68.3           |
| Female                      | 97     | 31.7           |
| Fuhrman grading             |        |                |
| 1                           | 46     | 15.0           |
| 2                           | 182    | 59.5           |
| 3                           | 59     | 19.3           |
| 4                           | 19     | 6.2            |
| Sarcomatoid differentiation |        |                |
| No                          | 292    | 95.4           |
| Yes                         | 14     | 4.6            |
| Necrosis                    |        |                |
| No                          | 228    | 74.5           |
| Yes                         | 78     | 25.5           |
| Vascular invasion           |        |                |
| No                          | 280    | 91.5           |
| Yes                         | 26     | 8.5            |
| T stage                     |        |                |
| I                           | 205    | 67.0           |
| II                          | 64     | 20.9           |
| III                         | 29     | 9.5            |
| IV                          | 8      | 2.6            |
| Lymph nodes invasion        |        |                |
| No                          | 283    | 92.5           |
| Yes                         | 23     | 7.5            |

ccRCC, clear cell renal cell carcinoma; SYSUCC, Sun Yat-sen University Cancer Center.

**Table S3.** Correlation between GYS1 expression and clinicopathological features in ccRCC (n = 304)

| Variable                    | All cases | GYS1 expression |            | P value      |
|-----------------------------|-----------|-----------------|------------|--------------|
|                             |           | Low             | High       |              |
| Age(years)                  |           |                 |            |              |
| ≤55                         | 172       | 90(52.3%)       | 82(47.7%)  | <b>0.035</b> |
| >55                         | 132       | 53(40.2%)       | 79(59.8%)  |              |
| Gender                      |           |                 |            |              |
| Male                        | 208       | 99(47.6%)       | 109(52.4%) | 0.775        |
| Female                      | 96        | 44(45.8%)       | 52(54.2%)  |              |
| Fuhrman grading             |           |                 |            |              |
| 1-2                         | 226       | 123(54.4%)      | 103(45.6%) | <b>0.000</b> |
| 3-4                         | 78        | 20(25.6%)       | 36(74.4%)  |              |
| Sarcomatoid differentiation |           |                 |            |              |
| No                          | 290       | 141(48.6%)      | 149(51.4%) | <b>0.013</b> |
| Yes                         | 14        | 2(14.3%)        | 12(85.7%)  |              |
| Necrosis                    |           |                 |            |              |
| No                          | 227       | 114(50.2%)      | 113(49.8%) | 0.056        |
| Yes                         | 77        | 29(37.7%)       | 48(62.3%)  |              |
| Vascular invasion           |           |                 |            |              |
| No                          | 278       | 133(47.8%)      | 145(52.2%) | 0.359        |
| Yes                         | 26        | 11(38.5%)       | 15(61.5%)  |              |
| T stage                     |           |                 |            |              |
| I                           | 203       | 104(51.2%)      | 99(48.8%)  | <b>0.038</b> |
| II-IV                       | 101       | 39(32.4%)       | 62(67.6%)  |              |
| Lymph nodes invasion        |           |                 |            |              |
| No                          | 282       | 135(47.9%)      | 147(52.1%) | 0.298        |
| Yes                         | 22        | 8(36.4%)        | 14(63.6%)  |              |

**Table S4.** Univariate and multivariate analyses of overall survival in ccRCC (n=305)

|                             | Univariate analysis   |                | Multivariate analysis |                |
|-----------------------------|-----------------------|----------------|-----------------------|----------------|
|                             | Hazard ratio (95% CI) | <i>P</i> value | Hazard ratio (95% CI) | <i>P</i> value |
| Age(years > 55)             | 1.934(1.223-3.057)    | <b>0.005</b>   | 1.523(0.945-2.453)    | 0.084          |
| Gender(male)                | 1.008(0.619-1.641)    | 0.974          |                       |                |
| Furman nuclear grade(3-4)   | 3.017(1.911-4.763)    | <b>0.000</b>   | 1.555(0.859-2.815)    | 0.144          |
| Sarcomatoid differentiation | 5.958(3.036-11.692)   | <b>0.000</b>   | 1.785(0.773-4.117)    | 0.175          |
| Necrosis                    | 2.648(1.674-4.189)    | <b>0.000</b>   | 1.316(0.783-1.045)    | 0.356          |
| Vascular invasion           | 2.428(1.276-4.618)    | <b>0.007</b>   | 1.078(0.508-2.291)    | 0.845          |
| T stage(Stage II-IV)        | 2.285(1.452-3.595)    | <b>0.000</b>   | 1.314(0.773-2.233)    | 0.312          |
| Lymph nodes invasion        | 4.344(2.464-7.657)    | <b>0.000</b>   | 2.504(1.296-4.838)    | <b>0.006</b>   |
| GYS1(High)                  | 2.437(1.484-4.003)    | <b>0.000</b>   | 1.783(1.045-3.042)    | <b>0.035</b>   |

**Table S5.** Correlation between PAS expression and clinicopathological features in ccRCC (n = 305)

| Variable                    | All cases | PAS staining |           | P value      |
|-----------------------------|-----------|--------------|-----------|--------------|
|                             |           | Low          | High      |              |
| Age(years)                  |           |              |           |              |
| ≤55                         | 174       | 119(68.4%)   | 55(31.6%) | 0.822        |
| >55                         | 131       | 88(67.2%)    | 43(32.8%) |              |
| Gender                      |           |              |           |              |
| Male                        | 208       | 142(68.3%)   | 66(31.7%) | 0.826        |
| Female                      | 97        | 65(67.0%)    | 32(33.0%) |              |
| Fuhrman grading             |           |              |           |              |
| 1-2                         | 227       | 157(69.2%)   | 70(30.8%) | 0.409        |
| 3-4                         | 78        | 50(64.1%)    | 28(35.9%) |              |
| Sarcomatoid differentiation |           |              |           |              |
| No                          | 291       | 200(68.7%)   | 91(31.1%) | 0.143        |
| Yes                         | 14        | 7(50.0%)     | 7(50.0%)  |              |
| Necrosis                    |           |              |           |              |
| No                          | 227       | 159(70.0%)   | 68(30.0%) | 0.165        |
| Yes                         | 78        | 48(61.5%)    | 30(38.5%) |              |
| Vascular invasion           |           |              |           |              |
| No                          | 279       | 194(69.2%)   | 85(30.8%) | <b>0.041</b> |
| Yes                         | 26        | 13(50.0%)    | 13(50.0%) |              |
| T stage                     |           |              |           |              |
| I                           | 205       | 142(69.3%)   | 63(30.7%) | 0.454        |
| II-IV                       | 100       | 65(65.0%)    | 35(35.0%) |              |
| Lymph nodes invasion        |           |              |           |              |
| No                          | 282       | 192(68.1%)   | 90(31.9%) | 0.777        |
| Yes                         | 23        | 15(65.2%)    | 18(34.8%) |              |

**Table S6.** Univariate and multivariate analyses of overall survival in ccRCC (n = 305)

|                             | Univariate analysis   |                | Multivariate analysis |                |
|-----------------------------|-----------------------|----------------|-----------------------|----------------|
|                             | Hazard ratio (95% CI) | <i>P</i> value | Hazard ratio (95% CI) | <i>P</i> value |
| Age (years > 55)            | 1.934(1.223-3.057)    | <b>0.005</b>   | 1.681(1.047-2.697)    | <b>0.032</b>   |
| Gender (male)               | 1.008(0.619-1.641)    | 0.974          |                       |                |
| Furman nuclear grade (3-4)  | 3.017(1.911-4.763)    | <b>0.000</b>   | 1.989(1.133-3.493)    | <b>0.017</b>   |
| Sarcomatoid differentiation | 5.958(3.036-11.692)   | <b>0.000</b>   | 1.925(0.848-4.370)    | 0.117          |
| Necrosis                    | 2.648(1.674-4.189)    | <b>0.000</b>   | 1.113(0.617-2.009)    | 0.721          |
| Vascular invasion           | 2.428(1.276-4.618)    | <b>0.007</b>   | 0.920(0.432-1.959)    | 0.829          |
| T stage (Stage II-IV)       | 2.285(1.452-3.595)    | <b>0.000</b>   | 1.354(1.021-1.796)    | <b>0.036</b>   |
| Lymph nodes invasion        | 4.344(2.464-7.657)    | <b>0.000</b>   | 2.208(1.158-4.209)    | <b>0.016</b>   |
| PAS (High)                  | 1.623(1.020-2.581)    | <b>0.041</b>   | 1.388(0.856-2.251)    | 0.183          |

## Supplementary Figures

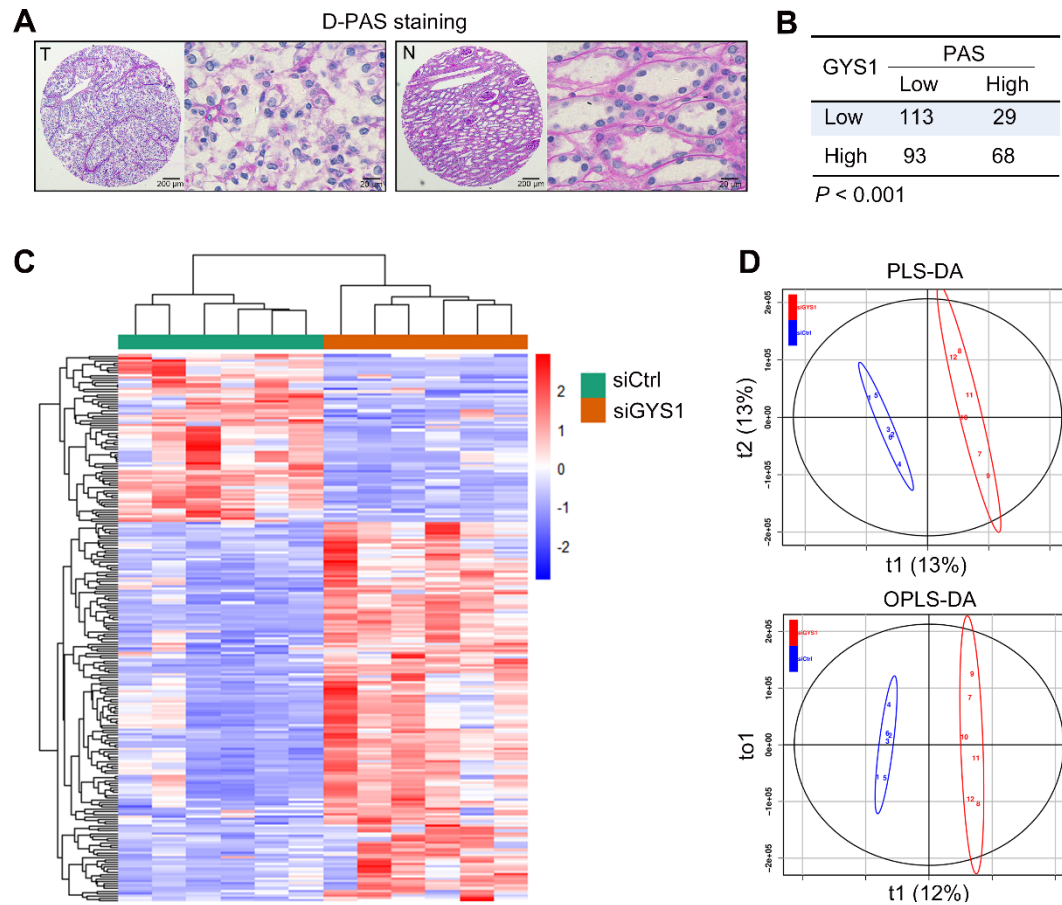

**Figure S1. Metabolites alterations in ccRCC cells. (A)** Representative images of tumor (T) and non-tumor (N) with D-PAS staining in ccRCC TMA. **(B)** The correlation of PAS staining and GYS1 expression in TMA tumor was determined by chi-square analysis. **(C)** Heatmap clustering of altered metabolites ( $P < 0.05$ ) in Caki-1 cells with GYS1 siRNAs treatment. **(D)** PLS-DA and OPLS-DA analysis of metabolomics data. Color of dots indicated control (blue) and GYS1 knockdown (red) samples.

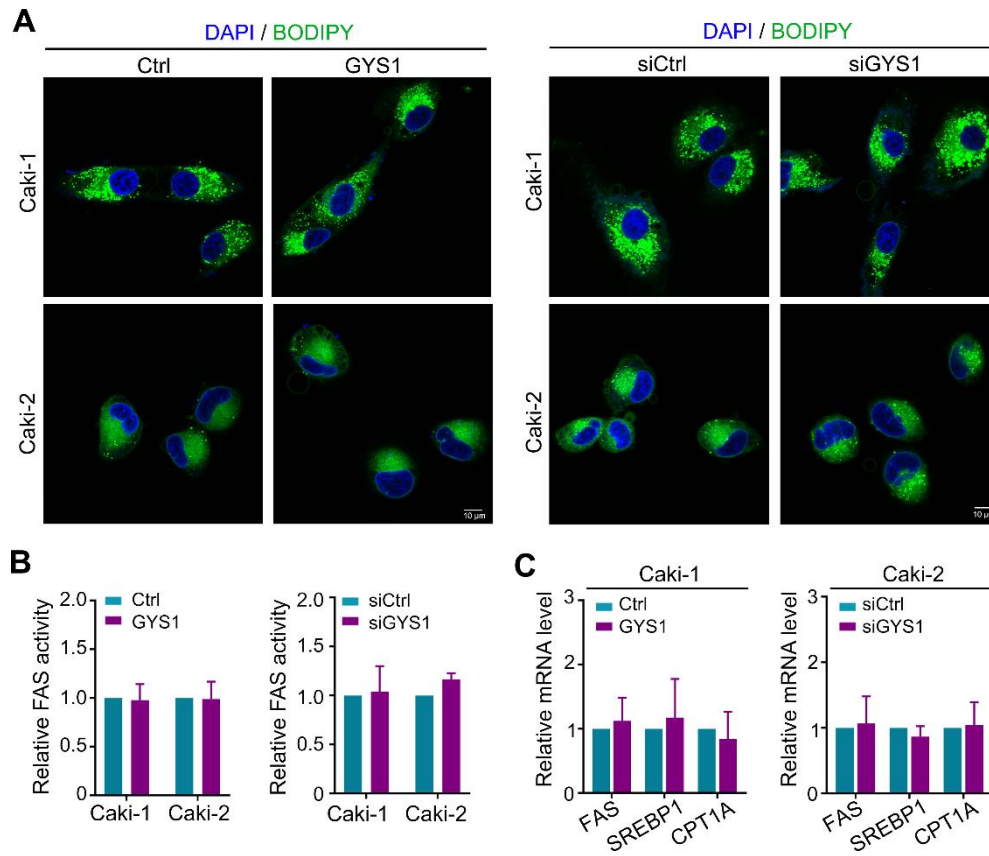

**Figure S2. GYS1 has no effect on lipid metabolism. (A)** Lipid content was measured by BODIPY immunofluorescent staining in ccRCC cells. **(B)** FAS activity was detected by a commercial kit in ccRCC cells. **(C)** The mRNA expression of the lipid storage and synthesis enzymes FAS, CPT1A and SERBP1 were examined by RT-PCR.



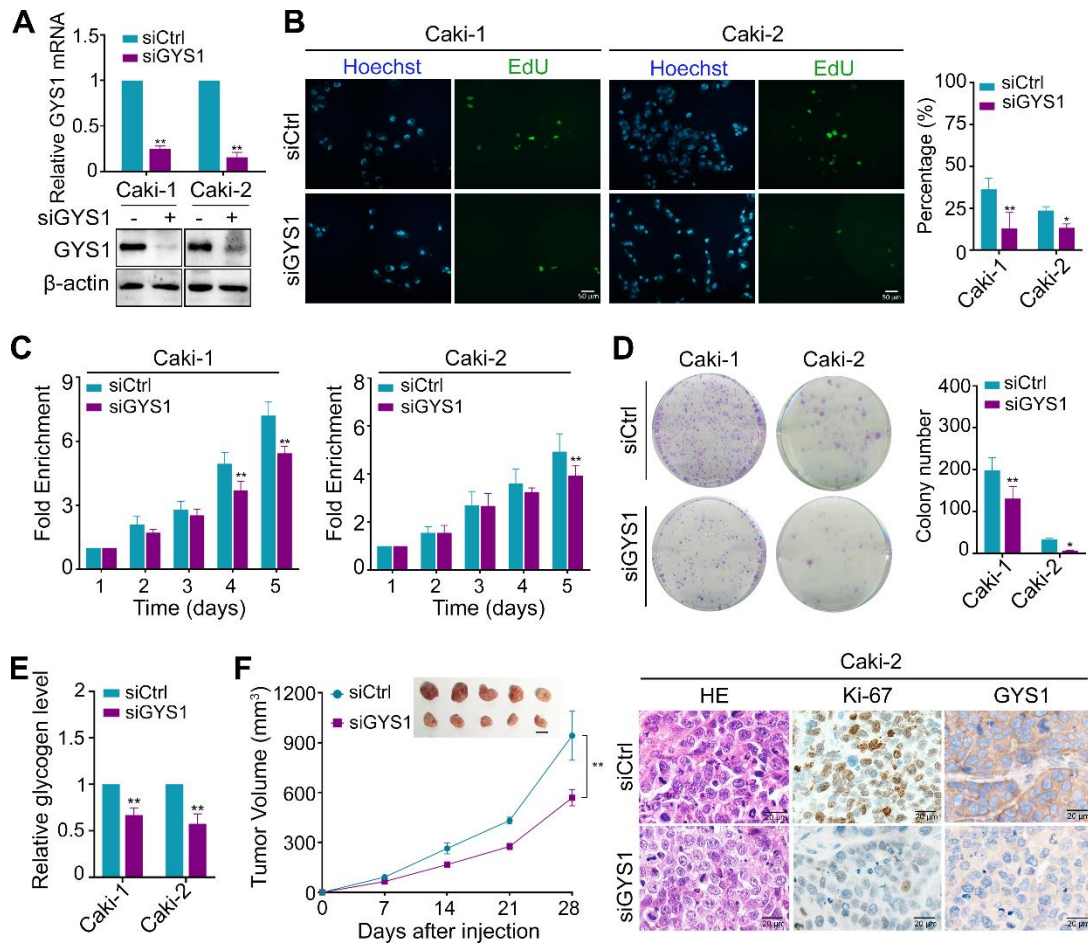

**Figure S3. GYS1 inhibition suppresses ccRCC proliferation *in vitro* and *in vivo*.** (A) GYS1 was depleted by transfection with siRNAs in Caki-1 and Caki-2 cells. The mRNA and protein levels of GYS1 were determined by qRT-PCR and western blot. (B) EdU assays showed the replication of DNA in cells induced by GYS1. Green staining denotes duplicated cells and blue denotes cell nucleus. (C) Cell activity was detected by CCK8 assay over five consecutive days. Relative absorbance was measured at OD<sub>450</sub>. Fold enrichment was normalized to the absorbance record on day 1. (D) Colony formation assays to determine the effect of GYS1 on cell growth. The number of colonies were counted using Image J software. (E) The glycogen content in cell lines with GYS1 silencing were detected by quantitative glycogen detection kit. (F) Xenograft mice experiment to evaluate the tumor growth *in vivo*. Mice were sacrificed at 28 days after inoculation. The volume of tumors was calculated. Representative images of HE staining and IHC are shown. Statistical data are represented as mean  $\pm$  SD. \* $P < 0.05$ , \*\* $P < 0.01$ .

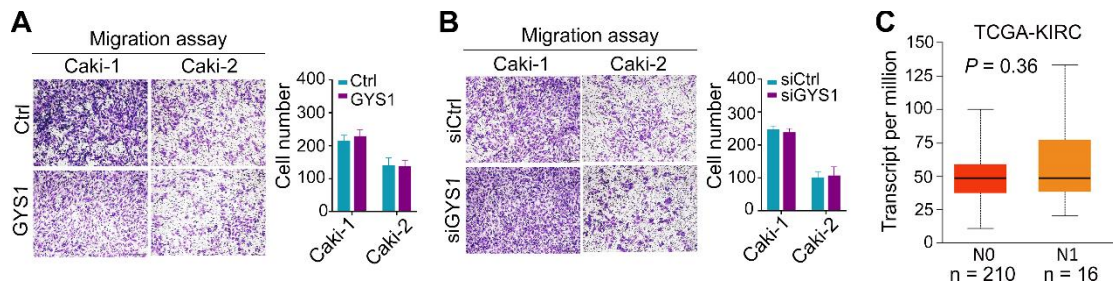

**Figure S4. GYS1 has no effect on metastasis. (A-B)** Representative images of transwell migration assay by GYS1 overexpression (A) or silencing (B). **(C)** TCGA-KIRC data showed no GYS1 expression difference between cases with or without lymph node metastasis. (N0 = No regional lymph node metastasis; N1 = Metastases 1-3 axillary lymph nodes).

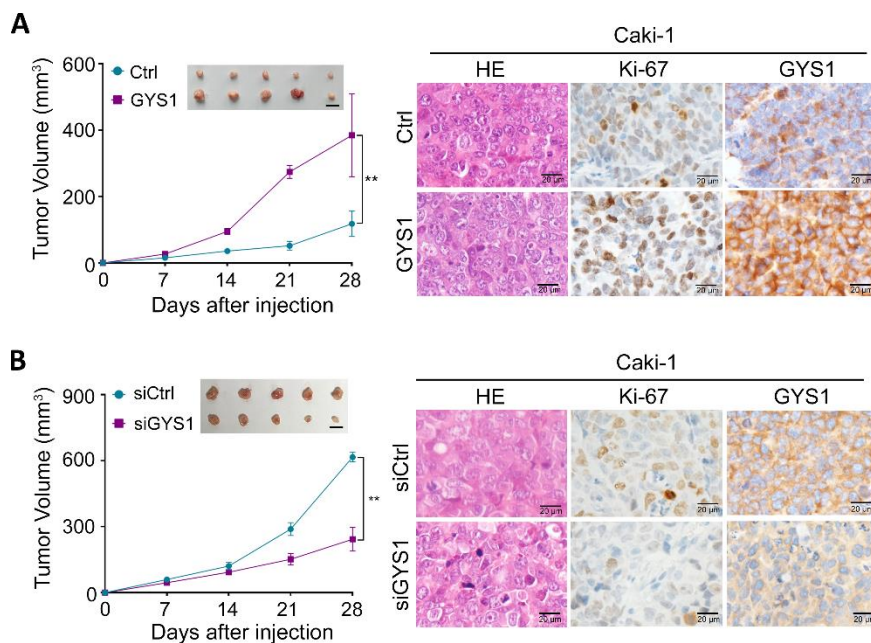

**Figure S5. Xenograft mice experiment to evaluate the tumor growth *in vivo*.** Caki-1 cells with GYS1 overexpression **(A)** or silencing **(B)** was injected into both flanks of the mice. Mice were sacrificed at 28 days after inoculation. The volume of tumors was calculated. Representative images of HE staining and IHC are shown. Statistical data are represented as mean  $\pm$  SD. **\*\*** $P < 0.01$ .

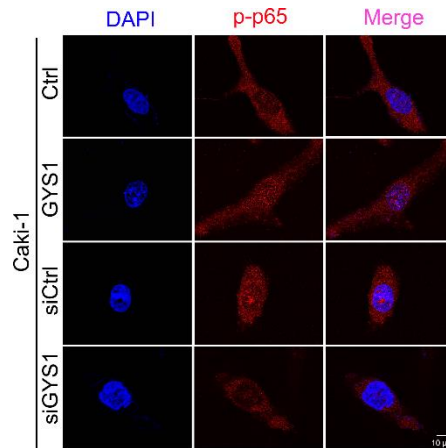

**Figure S6. GYS1 activates NF- $\kappa$ B signaling pathway.** IF images indicating the subcellular localization of p-p65 (red) referred to nucleus outlined stained by DAPI (blue) in Caki-1 cells.

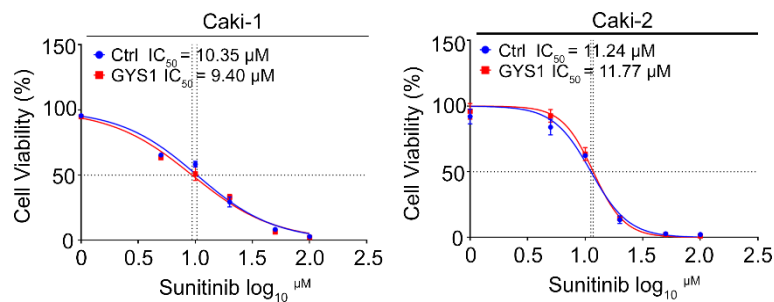

**Figure S7. GYS1 is synergistic with sunitinib in ccRCC cells.** Cells were treated by p65-depletion by transfection with p65 siRNAs. Then cell viability was detected by CCK8 assay at 48 h after GYS1 silencing and sunitinib treatment.  $IC_{50}$  was calculated using GraphPad Prism software.

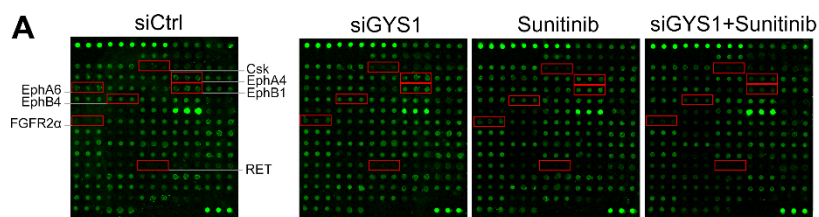

**B**

| RTKs                      | siGYS1 | Sunitinib | siGYS1+Sunitinib |
|---------------------------|--------|-----------|------------------|
| Csk                       | 2.09   | 2.07      | 1.10             |
| ErbB4                     | 3.88   | 2.50      | 1.71             |
| EphA4                     | 1.68   | 3.14      | 1.31             |
| FGFR2 ( $\alpha$ isoform) | 3.80   | 3.42      | 1.26             |
| EphB1                     | 3.19   | 4.20      | 0.96             |
| RET                       | 48     | 65        | 49               |

Fold Change Normalized to siCtrl

**Figure S8. RTK activation detection.** (A) The detection of receptor tyrosine kinases (RTK) activity was detected by protein microarray. (B) The list of altered kinases was shown in the table.

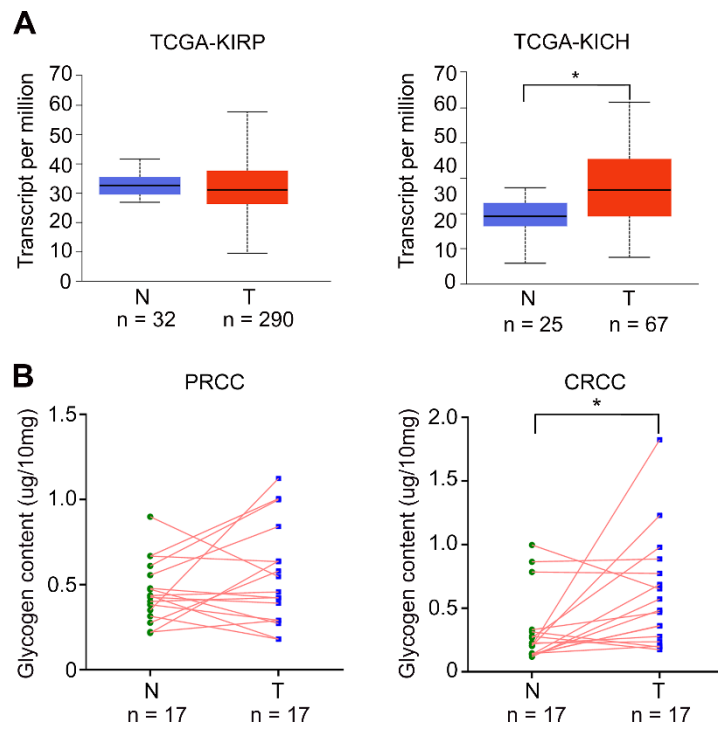

**Figure S9. GYS1 and glycogen expression in renal carcinoma. (A)** mRNA expression of GYS1 in TCGA-KIRP (papillary renal cell carcinoma, PRCC) and TCGA-KICH (chromophobe renal cell carcinoma, CRCC) were determined. **(B)** Glycogen levels were measured by quantitative colorimetric method in 17 ccRCC and corresponding adjacent non-tumor tissues. \* $P < 0.05$ .
